# Supplementary material for: Whey protein and soy protein prevent obesity by upregulating uncoupling protein 1 to activate brown adipose tissue and promote white adipose tissue browning in high-fat diet-fed mice
Source: Royal Society of Chemistry journal article supplement (doi:10.1039/d2fo01935c), 2022-01-01
Supplement: d2fo01935c1.pdf [file d2fo01935c1.pdf]

**Supplementary Table 1** Compositions of experimental diets

|                         | <b>Control</b> | <b>10% WPI</b> | <b>20% WPI</b> | <b>30% WPI</b> | <b>10% SPI</b> | <b>20% SPI</b> | <b>30% SPI</b> |
|-------------------------|----------------|----------------|----------------|----------------|----------------|----------------|----------------|
| <b>Ingredient (g)</b>   |                |                |                |                |                |                |                |
| Casein                  | 200            | 0              | 0              | 0              | 0              | 0              | 0              |
| Whey protein isolate    | 0              | 100            | 200            | 300            | 0              | 0              | 0              |
| Soy protein isolate     | 0              | 0              | 0              | 0              | 100            | 200            | 300            |
| L-Cystine               | 3              | 3              | 3              | 3              | 3              | 3              | 3              |
| Corn starch             | 506.2          | 0              | 0              | 0              | 0              | 0              | 0              |
| Maltodextrin 10         | 125            | 125            | 125            | 97.8           | 125            | 125            | 97.8           |
| Sucrose                 | 72.8           | 172.8          | 72.8           | 0              | 172.8          | 72.8           | 0              |
| Cellulose, BW200        | 50             | 50             | 50             | 50             | 50             | 50             | 50             |
| Soybean oil             | 25             | 25             | 25             | 25             | 25             | 25             | 25             |
| Cocoa butter            | 20             | 245            | 245            | 245            | 245            | 245            | 245            |
| Mineral mix S10026B     | 50             | 50             | 50             | 50             | 50             | 50             | 50             |
| Vitamin mix V10001C     | 1              | 1              | 1              | 1              | 1              | 1              | 1              |
| Choline bitartrate      | 2              | 2              | 2              | 2              | 2              | 2              | 2              |
| FD&C yellow dye #5      | 0.04           | 0              | 0              | 0              | 0              | 0              | 0              |
| FD&C blue dye #1        | 0.01           | 0.05           | 0.05           | 0.05           | 0.05           | 0.05           | 0.05           |
| Total (g)               | 1055.05        | 773.85         | 773.85         | 773.85         | 773.85         | 773.85         | 773.85         |
| <b>Energy (kcal %)</b>  |                |                |                |                |                |                |                |
| Protein                 | 20%            | 10%            | 20%            | 30%            | 10%            | 20%            | 30%            |
| Carbohydrate            | 70%            | 30%            | 20%            | 10%            | 30%            | 20%            | 10%            |
| Fat                     | 10%            | 60%            | 60%            | 60%            | 60%            | 60%            | 60%            |
| Energy density (kcal/g) | 3.85           | 5.22           | 5.22           | 5.22           | 5.22           | 5.22           | 5.22           |

**Supplementary Table 2** Primers sequences used in Real-time PCR

| Genes                                   | Sequence                  |
|-----------------------------------------|---------------------------|
| <i>UCPI</i> forward                     | TCACCACCTGGCAAAAACA       |
| <i>UCPI</i> reverse                     | GCAGGTGTTTCTCTCCCTGAA     |
| <i>PGC-1<math>\alpha</math></i> forward | ACCATGACTACTGTCAGTCACTC   |
| <i>PGC-1<math>\alpha</math></i> reverse | GTCACAGGAGGCATCTTTGAAG    |
| <i>AMPK<math>\alpha</math></i> forward  | CTACCTAGCAACCAGCCCAC      |
| <i>AMPK<math>\alpha</math></i> reverse  | ACGTCTGAGGGCTTTCCTTG      |
| <i>Cidea</i> forward                    | GCCGTGTTAAGGAATCTGCTGAGG  |
| <i>Cidea</i> reverse                    | GGATGGCTGCTCTTCTGTATCGC   |
| <i>SREBP1c</i> forward                  | GGATGCGGCTGTTGTCTACCATAAG |
| <i>SREBP1c</i> reverse                  | CCAGGTTAGAAGCAGCAAGATGTCC |
| <i>PPAR<math>\gamma</math></i> forward  | GCCAAGGTGCTCCAGAAGATGAC   |
| <i>PPAR<math>\gamma</math></i> reverse  | GTGAAGGCTCATGTCTGTCTCTGTC |
| <i>LPL</i> forward                      | CGCTCTCAGATGCCCTACAAAGTG  |
| <i>LPL</i> reverse                      | TTGTGTTGCTTGCCATCCTCAGTC  |
| <i>DGAT1</i> forward                    | AGCTATCCAGACAACCTGACCTACC |
| <i>DGAT1</i> reverse                    | TCAAGAACTCGTCGTAGCAGAAAGC |
| <i>CD36</i> forward                     | GCAGGTCTATCTACGCTGTGTTCG  |
| <i>CD36</i> reverse                     | TGTCTGGATTCTGGAGGGGTGATG  |
| <i>SLC27A1</i> forward                  | TCTACGGGTTGACGGTGGTACTG   |
| <i>SLC27A1</i> reverse                  | CTCAGCAGGTAGCGGCAGATTTC   |
| <i>HSL</i> forward                      | GACAGGACAGCAAGGTACTCAACAG |
| <i>HSL</i> reverse                      | GCCTCCGTGGATGTGAACAACC    |
| <i>CPT1b</i> forward                    | GAGGAAGGGTAGAGTGGGCAGAG   |
| <i>CPT1b</i> reverse                    | TCATCCAGGGTCACAAAGAAAGCAG |
| <i>RPL13A</i> forward                   | GAGGTCGGGTGGAAGTACCA      |
| <i>RPL13A</i> reverse                   | TGCATCTTGGCCTTTTCCTT      |

*UCPI*, uncoupling protein 1; *PGC-1 $\alpha$* , peroxisome proliferator-activated receptor gamma coactivator-1 $\alpha$ ; *AMPK $\alpha$* , AMP-activated protein kinase alpha; *Cidea*, cell death-inducing DNA fragmentation factor-like effector A; *SREBP1c*, sterol regulatory element binding protein-1c; *PPAR $\gamma$* , peroxisome proliferator-activated receptor gamma; *LPL*, lipoprotein lipase; *DGAT1*, diacylglycerol O-acyltransferase 1; *CD36*, cluster of differentiation 36; *SLC27A1*, solute carrier family 27 member 1; *HSL*, hormone-sensitive lipase; *CPT1b*, carnitine palmityl transferase 1b; *RPL13A*, ribosomal protein L13A.

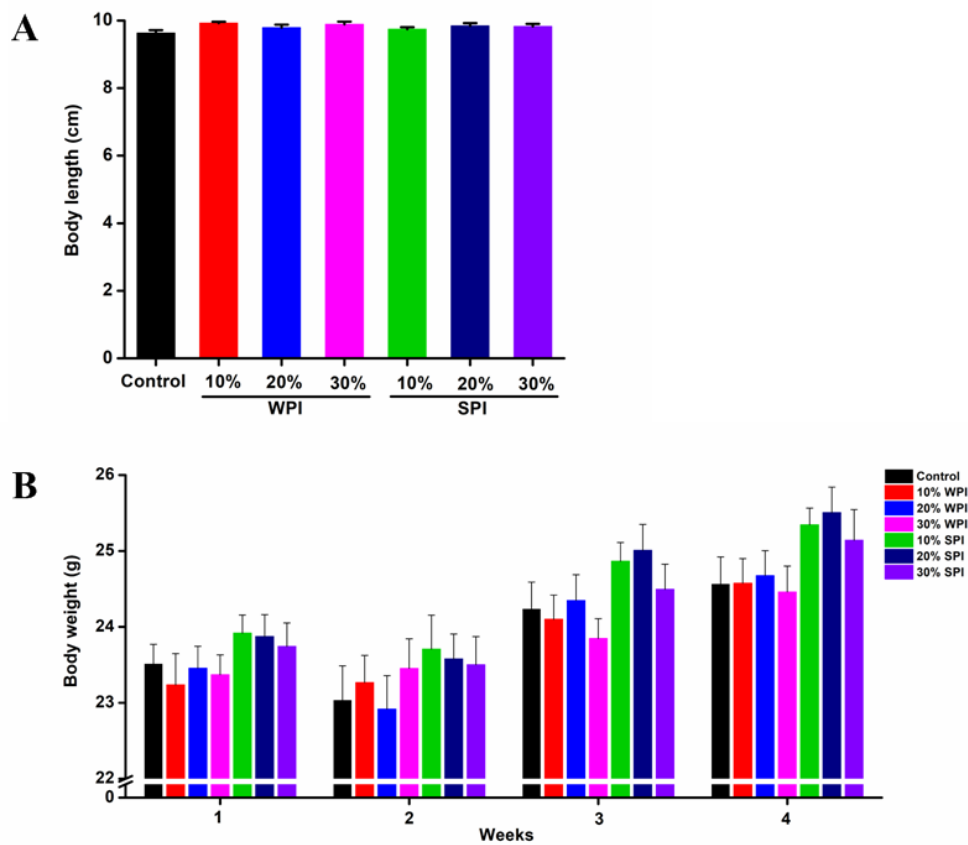

**Supplementary Fig. 1** Impact of WPI, SPI and the P/C ratio on body length of mice after 12 weeks of intervention (A) and body weight during the first 4 weeks of dietary intervention (B).
